# 1 **No evidence for prolactin's involvement in the post-ejaculatory refractory period**

2

3 Susana Valente<sup>1,2</sup>, Tiago Marques<sup>3,4,5</sup> & Susana Q. Lima<sup>1\*</sup>

4 1. Champalimaud Neuroscience Programme, Champalimaud Centre for the Unknown, Av.  
5 Brasilia, s/n Lisboa, Portugal

6 2. Graduate Program in Areas of Basic and Applied Biology (GABBA), University of  
7 Porto, 4200-465 Porto, Portugal

8 3. Department of Brain and Cognitive Sciences, MIT, Cambridge, MA02139, USA

9 4. McGovern Institute for Brain Research, MIT Cambridge, MA02139, USA.

10 5. Center for Brains, Minds and Machines, MIT, Cambridge, MA02139, USA

11

12 \* corresponding author: [susana.lima@neuro.fchampalimaud.org](mailto:susana.lima@neuro.fchampalimaud.org)

13

14

## 15 **Abstract**

16 In many species, ejaculation is followed by a state of decreased sexual motivation, the post-  
17 ejaculatory refractory period. Several lines of evidence have suggested prolactin, a pituitary  
18 hormone released around the time of ejaculation in humans and other animals, to be a decisive  
19 player in the establishment of the refractory period. However, data supporting this hypothesis is  
20 controversial. We took advantage of two different strains of house mouse, a wild derived and a  
21 classical laboratory strain, that differ substantially in their sexual behavior, to investigate  
22 prolactin's involvement in sexual motivation and the refractory period. First, we show that there  
23 is prolactin release during sexual behavior in male mice. Second, using a pharmacological  
24 approach, we show that acute manipulations of prolactin levels, either mimicking the natural  
25 release during sexual behavior or inhibiting its occurrence, do not affect sexual motivation or  
26 shorten the refractory period, respectively. Therefore, we show compelling evidence refuting the  
27 idea that prolactin released during copulation is involved in the establishment of the refractory  
28 period, a long-standing hypothesis in the field of behavioral endocrinology.

## 29 **Introduction**

30 Sexual behavior follows the classical sequence of motivated behaviors, terminating with an  
31 inhibitory phase after ejaculation: the post-ejaculatory refractory period (PERP)<sup>1</sup>. The PERP is  
32 highly conserved across species and includes a general decrease in sexual motivation and also  
33 inhibition of erectile function in humans and other primates<sup>2</sup>. This period of time is variable across  
34 and within individuals and is affected by many factors, such as age<sup>3,4</sup> or the presentation of a new

35 sexual partner<sup>5,6</sup>. The PERP is thought to allow replacement of sperm and seminal fluid,  
36 functioning as a negative feedback system where by inhibiting too-frequent ejaculations an  
37 adequate sperm count needed for fertilization is maintained<sup>7,8</sup>.

38 Several lines of evidence have suggested the hormone prolactin (PRL) to be a key player in the  
39 establishment of the PERP<sup>9,10</sup>. PRL is a pleiotropic hormone, first characterized in the context of  
40 milk production in females, but for which we currently know several hundred physiological effects  
41 in both sexes<sup>11,12</sup>. The association of PRL to the establishment of the PERP in males is based on  
42 several observations. First, it was shown that PRL is released around the time of ejaculation in  
43 humans and rats<sup>13-21</sup>. Anecdotally, no PRL release has been observed in a subject with multiple  
44 orgasms<sup>22</sup>. Second, chronically abnormal high levels of circulating PRL are associated with  
45 decreased sexual drive, anorgasmia and ejaculatory dysfunctions<sup>23,24</sup>. Finally, removal of PRL-  
46 producing pituitary tumors or treatment with drugs that inhibit PRL release reverse sexual  
47 dysfunctions<sup>25,26</sup>. Taking these observations into consideration, it has been hypothesized that the  
48 PRL surge around the time of ejaculation plays a role in the immediate subsequent decrease of  
49 sexual arousal, the hallmark of the PERP. In fact, this idea is widespread in behavioral  
50 endocrinology textbooks<sup>27</sup> and the popular press<sup>1\*</sup>.

51 PRL is primarily produced and released into the bloodstream from the anterior pituitary<sup>11,28</sup>,  
52 reaching the central nervous system either via circumventricular regions lacking a blood-brain  
53 barrier<sup>29</sup> or via receptor-mediated mechanisms<sup>30</sup>, binding its receptor which has widespread  
54 distribution, including in the social brain network<sup>31</sup>. Hence, circulating PRL can impact the activity  
55 of neuronal circuits involved in the processing of socio-sexual relevant cues and in principle alter  
56 the detection of opposite-sex conspecific cues and thus sexual arousal<sup>32,33</sup>. Circulating PRL reaches  
57 the central nervous system on a timescale that supports the rapid behavioral alterations that are  
58 observed immediately after ejaculation (in less than 2 minutes)<sup>34</sup>. Through mechanisms that are  
59 not yet well established, PRL elicits fast neuronal responses<sup>35</sup> besides its classical genomic  
60 effects<sup>36</sup>. In summary, circulating PRL can reach the brain and affect brain regions involved in  
61 socio-sexual behavior on a time scale compatible with the establishment of the PERP.

62 However, despite data supporting the involvement of the ejaculatory PRL-surge in the  
63 establishment of the PERP, this hypothesis has received numerous critics<sup>2,3,37-39</sup>. While in humans  
64 it is well established that chronically high levels of PRL reduces sexual motivation<sup>24</sup>, some authors  
65 suggest that those results were erroneously extended to the acute release of PRL<sup>2,3,37-39</sup>.  
66 Furthermore, there is controversy in relation to PRL dynamics during sexual behavior, since in  
67 most studies PRL levels were quantified during fixed intervals of time, and not upon the occurrence  
68 of particular events, such as ejaculation. In fact, some reports in rats suggest that PRL levels are  
69 elevated through the entire sexual interaction<sup>40,41</sup>. Finally, formal testing of the impact of acute  
70 PRL manipulations on sexual motivation and performance is still missing (but see<sup>42</sup> for an acute  
71 manipulation in humans).

---

<sup>1\*</sup> [https://en.wikipedia.org/wiki/Refractory\\_period](https://en.wikipedia.org/wiki/Refractory_period); <https://www.humanitas.net/treatments/prolactin>

72 In the present study, we tested the role of PRL in sexual motivation and in the establishment of the  
73 PERP in the mouse. The sequence of sexual behavior in the mouse is very similar to the one  
74 observed in humans<sup>43</sup>, making it an ideal system to test this hypothesis. Also, we took advantage  
75 of two strains of inbred mice that are representative of two different mouse subspecies (C57BL/6J:  
76 laboratory mouse, predominantly *Mus musculus domesticus* and PWK/PhJ: inbred wild-derived,  
77 *Mus musculus musculus*<sup>44</sup>) and exhibit different sexual performance. Through routine work in our  
78 laboratory, we observed that while most BL6 males take several days to recover sexual interest  
79 after ejaculation, a large proportion of PWK males will re-initiate copulation with the same female  
80 within a relatively short period of time. This difference in PERP duration can be taken to our  
81 advantage, widening the dynamic range of this behavioral parameter and increasing the probability  
82 of detecting an effect of the manipulation.

83 By monitoring PRL levels in sexually behaving male mice and pharmacological manipulations,  
84 we specifically asked the following questions: (i) what is the PRL release dynamics during sexual  
85 behavior? (ii) is an acute PRL release sufficient to decrease sexual motivation, the hallmark of the  
86 PERP? And consequently (iii) does blocking the acute release of PRL during copulation shorten  
87 the duration of the PERP?

88

## 89 **Results**

### 90 **Prolactin is released during sexual behavior in male mice**

91 We first asked if PRL is released during copulation in our two strains of male mice. To monitor  
92 PRL dynamics during sexual behavior we took advantage of a recently developed ultrasensitive  
93 ELISA assay that can detect circulating levels of PRL in very small volumes of whole blood (5-  
94 10 microliters), allowing the assessment of longitudinal PRL levels in freely behaving mice<sup>45</sup>.  
95 Sexually trained laboratory mice (C57BL/6J, from here on BL6) or inbred wild-derived mice  
96 (PWK/PhJ, from here on PWK) were paired with a receptive female and allowed to mate (see  
97 Methods for details). During the sexual interaction males were momentarily removed from the  
98 cage to collect tail blood after which they returned to the behavioral cage, resuming the sexual  
99 interaction with the female. We collected blood samples upon the execution of pre-determined,  
100 easily identifiable, behavioral events that correspond to different internal states of the male: before  
101 sexual arousal (*baseline*, before the female was introduced in the cage), at the transition from  
102 appetitive to consummatory behavior (*mount attempt*, immediately after the male attempted to  
103 mount the female for the first time), during consummatory behavior (*mount*, after a pre-determined  
104 number of mounts with intromissions, BL6=5 and PWK=3) and immediately after ejaculation  
105 (*ejaculation*, after the male exhibited the stereotypical shivering and falling to the side) (Fig.1a,  
106 please see Methods for details).

107 Baseline levels of circulating PRL in male mice were low for both strains (BL6  $0.86 \pm 0.46$ ; PWK:  
108  $2.31 \pm 1.37$  ng/ml; please see<sup>45</sup> for BL6), but are significantly increased during sexual interaction  
109 (BL6:  $F_{3,7} = 21.26$ ;  $P < 0.0001$ ; PWK  $F_{3,8} = 17.18$ ;  $P < 0.0001$ , RM One-way ANOVA (Fig.1a).

110 While in the case of BL6 males PRL levels only increased during the consummatory phase, PRL  
111 levels in PWK males are significantly increased already at the transition from appetitive to  
112 consummatory behavior (baseline vs MA  $16.30 \pm 6.67$  ng/ml,  $P = 0.001$ , Tukey's multiple  
113 comparisons test) (Fig. 1a). In both strains, PRL levels after ejaculation are similar to the levels  
114 reached during consummatory behavior (BL6  $P = 0.71$  vs PWK  $P = 0.95$ , Tukey's multiple  
115 comparisons test), in marked contrast to humans, where PRL seems to be released only around the  
116 time of ejaculation<sup>15</sup>.

117 Contrary to PWK males, which in the presence of a receptive female always engaged in sexual  
118 behavior, a large percentage BL6 males did not become sexual aroused (15 out of 23) and never  
119 tried to mount the female (a session was aborted if 30 minutes after female entry the male did not  
120 initiate a mount attempt, see Methods for details). Blood was also collected in this condition, at  
121 the end of the 30 minutes social interaction (Fig. 1b). In this case, PRL levels of BL6 males did  
122 not differ from baseline (baseline  $0.99 \pm 0.67$  vs Social  $1.25 \pm 0.63$ ;  $P = 0.282$ , Paired  $t$  test),  
123 further suggesting that PRL is only released in the context of a sexual interaction.

124 Because PRL is known to be released under stress<sup>46</sup> and to ensure that the changes observed in  
125 circulation are not a result from the blood collection procedure itself, all animals were initially  
126 habituated to the collection protocol in another cage, alone. To ensure that the habituation protocol  
127 worked, in a separate experiment we measured PRL levels in the absence of any behavior. Four  
128 blood samples were collected 20 minutes apart from BL6 and PWK males in their home cage (Fig.  
129 1c). In both cases, circulating PRL levels were not altered, ensuring that the observed increases  
130 were not caused by the manipulation (BL6:  $F_{3,7} = 2.08$ ;  $P = 0.18$ ; PWK  $F_{3,7} = 2.94$ ;  $P = 0.11$ , RM  
131 One-way ANOVA).

132 Collectively, these results demonstrate that PRL is released during sexual behavior in male mice,  
133 but not during a social interaction or during the blood collection protocol, prompting us to examine  
134 the role of PRL release during sexual behavior.

135

### 136 **Acute prolactin release does not induce a refractory period-like state**

137 To investigate if the increase in circulating levels of PRL that occurs during the sexual interaction  
138 is sufficient to decrease sexual motivation, a hallmark of the PERP, we employed a  
139 pharmacological approach to acutely elevate PRL levels before the animals became sexually  
140 aroused and assess if the male mice behave as if they are in a PERP-like state. PRL is produced in  
141 specialized cells of the anterior pituitary, the lactotrophs, and its release is primarily controlled by  
142 dopamine originating from the hypothalamus. Dopamine binds D2 receptors at the membrane of  
143 the lactotrophs, inhibiting PRL release. Suppression of dopamine discharge leads to disinhibition  
144 of lactotrophs, which quickly release PRL into circulation<sup>47,48</sup>. To acutely elevate PRL levels, we  
145 performed an intraperitoneal injection of the D2 dopamine receptor antagonist domperidone,  
146 which does not cross the blood brain barrier<sup>49,50</sup>, and measured PRL levels 15 minutes after the  
147 procedure. As expected, domperidone administration lead to a sharp rise in the levels of circulating  
148 PRL, of similar magnitude to what is observed during copulation (Fig. 2a, BL6: domp  $12.54 \pm$

149 2.032 vs ejac  $7.789 \pm 3$ ,  $P = 0.0024$ ; PWK: domp  $25.87 \pm 7.15$  vs ejac  $18.55 \pm 6.46$ ;  $P = 0.037$ ,  
150 Unpaired  $t$  test).

151 Therefore, next we investigated how domperidone-treated male mice behave with a receptive  
152 female. If PRL is sufficient to induce a PERP-like state, treated males should exhibit decreased  
153 sexual motivation, which could be manifested in distinct manners, such as on the latency to initiate  
154 consummatory behavior or the vigor of copulation. Each male from the two strains was tested  
155 twice, once with vehicle and another time with domperidone, in a counter-balanced manner and  
156 all the annotated behaviors are depicted over time on Fig. 2b and c (see Methods for details).  
157 Despite differences in the dynamics of sexual behavior across strains, administration of  
158 domperidone does not seem to affect sexual motivation, as we could not detect any significant  
159 difference in the latency to start mounting the female, frequency of attempts to mount the female,  
160 time taken to ejaculate or proportion of animals that reached ejaculation (Fig. 2d-g). Domperidone  
161 administration also does not seem to affect the dynamics of the sexual interaction across the session  
162 or within each mount (Fig. 2i and j respectively) or other measures of sexual behavioral  
163 performance (please see Supplementary Fig. 2).

164 In summary, domperidone administration, which causes an acute elevation of circulating PRL  
165 levels similar to what is observed at the end of copulation, does not have an inhibitory effect on  
166 any behavioral parameter related to sexual motivation on the two strains of mice tested, this is, it  
167 does not induce a PERP-like state.

168

### 169 **Blocking prolactin release during copulation does not decrease the duration of the refractory** 170 **period**

171 The release of PRL which is observed during sexual behavior has been proposed to be central in  
172 the establishment of the PERP<sup>9</sup>. To test this hypothesis, we acutely inhibited PRL release during  
173 sexual behavior by taking advantage of bromocriptine, a D2 receptor agonist. Bromocriptine's  
174 activation of D2 receptors on the lactotrophs' membrane blocks PRL release, a well-established  
175 procedure to inhibit the discharge of this hormone from the pituitary<sup>31,51</sup>. If PRL is indeed  
176 necessary for the establishment of the PERP, we expected that after ejaculation, drug-treated males  
177 to regain sexual motivation faster than controls.

178 To test bromocriptine's efficiency in blocking PRL release during sexual behavior, we first  
179 injected males with bromocriptine and measured PRL levels at three time points: i) before the  
180 drug or vehicle injection, ii) before the female was inserted in the cage and then iii) after ejaculation  
181 (Fig. 3a). As shown in Fig. 3a, bromocriptine administration efficiently blocked PRL release in  
182 both subspecies of mice, since PRL levels after ejaculation are not different from baseline (BL6:  
183 B1 vs Ejac,  $P=0.3$ , B2 vs Ejac  $P = 0.99$ ; PWK: B1 vs Ejac,  $P = 0.97$ , B2 vs Ejac  $P = 0.99$ ; Tukey's  
184 multiple comparisons test after RM Two way Anova).

185 To test the effect of the pharmacological manipulation on PERP duration, the male and female  
186 were allowed to remain in the cage undisturbed for a period of up to 2 hours after ejaculation. Each  
187 male from the two strains was tested twice, once with vehicle and a second time with

188 bromocriptine, in a counter-balanced manner. Each session ended once the male performed the  
189 first attempt of copulation after ejaculation or after two hours if no attempt was made (Fig. 3b, see  
190 Methods for details). All the annotated behaviors are depicted over time on Fig. 3b and c (see  
191 Methods for details).

192 As shown in Fig. 3d, inhibiting PRL release during sexual behavior did not change the proportion  
193 of male mice of the two strains that reached ejaculation or regained sexual interest in the two hours  
194 after ejaculation. Also, and contrary to what was expected, we observed a significant increase in  
195 the PERP of PWK males (Fig. 3e, Veh:  $21.7 \pm 4.18$  vs Bromo:  $35.4 \pm 16.3$ ,  $P = 0.007$  by Wilcoxon  
196 signed rank test). Administration of bromocriptine seems to affect the initial sexual motivation, as  
197 we could detect a decrease in the latency to start mounting the female (Fig. 3f, trend for B6 males  
198 and significant for PWK, Veh:  $4.06 \pm 4.35$  vs Bromo:  $1.93 \pm 1.13$ ,  $P = 0.06$ ; and Veh:  $2.78 \pm 1.7$   
199 vs Bromo:  $1.48 \pm 0.55$ ,  $P = 0.01$ , respectively, by Wilcoxon signed rank test). This observation  
200 was not due to an increase in activity/locomotion of the bromocriptine treated males as the average  
201 male speed before and after the female entry was not affected by the manipulation, nor the distance  
202 between the pair. However, besides the locomotor activity being the same, the average male speed  
203 projected towards the female increased significantly for PWK treated with bromocriptine as they  
204 moved in a goal directed way, directionally towards the female (Supplementary Fig. 3).

205 However, once consummatory behavior was initiated, control and bromocriptine-treated males  
206 exhibited similar levels of sexual motivation, as we could not detect any difference in the frequency  
207 of attempts to mount the female or time taken to reach ejaculation (Fig 3g and h). Other aspects of  
208 the sexual interaction were also not altered (Supplementary Fig. 3). Furthermore, bromocriptine  
209 administration does not seem to affect the dynamics of the sexual interaction across the session or  
210 within each mount (Fig. 3i and j respectively).

211 In summary, blocking PRL release during copulation does not affect the proportion of animals that  
212 regain sexual motivation within two hours after ejaculation and contrary to what was expected,  
213 bromocriptine leads to an increase in the duration of the PERP of PWK males. Except for a  
214 decrease in the latency to start mounting, maintaining circulating PRL low, at levels similar to  
215 what is observed prior to the sexual interaction, does not affect any of the parameters of sexual  
216 performance analyzed.

217

## 218 Discussion

219 The post ejaculatory refractory period or PERP is highly conserved across species and is  
220 characterized by a general decrease in sexual motivation after ejaculation<sup>2</sup>. The pituitary hormone  
221 PRL is released during copulation and has been put forward as the main player in the establishment  
222 of the PERP<sup>9</sup>. However, the involvement of PRL in the establishment and duration of the PERP is  
223 controversial and has not been formally tested<sup>2</sup>. Here we show that despite being released during  
224 copulation as previously shown in other taxa, PRL is neither sufficient nor necessary for the  
225 establishment of the PERP.

226 In this study we investigated the role of PRL in the PERP of two different strains of mice that  
227 belong to the two main subspecies of house mouse, *Mus musculus musculus* (PWK) and *Mus*  
228 *musculus domesticus* (BL6), for two main reasons. As already presented, the two strains have very  
229 different PERP duration, widening the dynamic range of this behavioral parameter and increasing  
230 the probability of detecting an effect of the manipulations. Second, although fundamental for many  
231 present-day discoveries, the usage of the common inbred strains of mice comes at a cost, due to  
232 the limitations in their genetic background that sometimes leads to results that are specific to the  
233 strain of mouse used<sup>52-54</sup>. Wild derived strains of mice are valuable tools that can complement the  
234 genetic deficiencies of classical laboratories strains of mice<sup>44,55,56</sup>. Also, despite the fact that larger  
235 numbers of animals are used (because experiments are repeated on each mouse strain), this  
236 approach is already routinely used in other fields, such as in immunological studies<sup>57</sup> providing  
237 greater confidence to the results obtained from the effect of pharmacological manipulations on  
238 behavior, for example.

239 We first showed that PRL is released during copulation in male mice. Interestingly, even though  
240 being quite an invasive technique, after being habituated to the procedure, sexual behavior does  
241 not seem to be affected before or during the consummatory phase. This opens up the possibility to  
242 perform such type of experiments using an “within-animal” design, a very important point  
243 particularly when there is a large inter-individual variability, while decreasing the number of  
244 animals used.

245 Despite being released during sexual behavior in mice, PRL dynamics are quite different from  
246 what has been observed in humans. In men, PRL seems to only be released around the time of  
247 ejaculation<sup>15,16</sup>, and only when ejaculation is achieved<sup>16</sup>. Indeed, the fact that PRL surge was only  
248 observed when ejaculation was achieved was one of the main results that lead to the idea that PRL  
249 may play a role in the acute regulation of sexual arousal after orgasm in humans<sup>58</sup>. In contrast, in  
250 mice we observed an increase in circulating levels of PRL in sexually aroused PWK males and in  
251 BL6 males during the consummatory phase. The discrepancy between our results and the results  
252 published by others might be a result of the sampling procedure. Despite the fact that in human  
253 studies blood was continuously collected, PRL detection was performed at fixed time intervals and  
254 not upon the occurrence of particular events, such as ejaculation. Therefore, when averaging PRL  
255 levels across individuals, each participant might be in a slightly different state of arousal. Also,  
256 because PRL concentration is determined over fixed intervals of time, it is difficult to pinpoint the  
257 PRL surge to the time of ejaculation (even though the human studies show that sexual arousal per  
258 se is not accompanied by an increase in PRL levels)<sup>9</sup>. To our knowledge, a single study assessed  
259 PRL levels during sexual behavior in male mice, stating that PRL is released after ejaculation<sup>59</sup>.  
260 In this case, blood was also continuously sampled at fixed intervals of time. In contrast, in our  
261 study the blood was collected upon the execution of particular events, such as the first mount  
262 attempt, a pre-defined number of mounts and ejaculation. Thus, even though the intervals between  
263 PRL measurements are different for each mouse, we ensure that PRL levels are measured for all  
264 individuals in a similar internal state. Independently of the differences in the dynamics of

265 circulating PRL levels, the raise we observe seems to be specific to a sexual encounter, since PRL  
266 levels in BL6 males that never attempt copulation remain unaltered from baseline.

267 In order to test if PRL by itself is sufficient to decrease sexual motivation, we injected domperidone  
268 to induce an artificial PRL-surge. In this case, the male mouse should behave like a male mouse  
269 that just ejaculated: for example, exhibit longer latency to initiate the sexual interaction, which in  
270 the case of BL6 mice should take days. Even though domperidone administration causes  
271 circulating levels of PRL that are similar to the ones observed at the end of a full sexual interaction,  
272 this manipulation did not cause any alteration in terms of sexual motivation or performance, as all  
273 behavioral parameters remained unaltered for both strains of mice. The fact that, by itself, PRL  
274 did not have an impact on sexual motivation might be due to the fact that other neuromodulators  
275 and hormones whose levels increase during a normal sexual interaction (serotonin and oxytocin  
276 for example)<sup>60</sup>, were not altered by our manipulation. Further experiments could test this idea by  
277 examining if combinations of different neuromodulators and hormones administered together can  
278 induce a PERP-like state.

279 Last, we asked if the elevation in PRL levels during sexual behavior is necessary for the  
280 establishment and duration of the PERP. For that we took a complementary pharmacological  
281 approach, where we injected bromocriptine, a D2 receptor agonist that temporarily inhibits the  
282 release of PRL. PRL levels after ejaculation in bromocriptine-treated males are similar to pre-  
283 copulatory levels. If PRL is indeed necessary to establish the PERP, we would expect a decrease  
284 in its duration that should easily be observed in the PWK males (since they regain sexual interest  
285 on average 30 minutes after ejaculation) or even in the BL6 (which take days). The proportion of  
286 animals re-engaging in sexual behavior during the 2 hours limit could also be increased for the two  
287 strains. We observed a decrease in the latency to start mounting the female and, contrary to our  
288 expectation, a significant increase in the PERP duration of PWK males. We believe these effects  
289 may be mediated by the direct effect of bromocriptine in the central nervous system, rather than  
290 an effect of PRL itself. First, baseline PRL levels are already very low in male mice and therefore  
291 the manipulation most likely did not affect them. Second, systemic administration of dopamine  
292 agonists has shown that anticipatory measures of sexual behavior are more sensitive to disruption  
293 than are consummatory measures of copulation<sup>61,62</sup>. This agrees with our results, where we  
294 observed a significant decrease in the latency to initiate mounting with bromocriptine, while no  
295 other parameter of sexual performance was affected. Interestingly, bromocriptine-treated PWK  
296 males seem more ballistic in their approach to the female, suggesting a more goal-directed  
297 behavior towards the female. Bromocriptine (and domperidone) might also have an effect outside  
298 the central nervous system as D2 receptors are expressed in the human and rat seminal vesicles<sup>63</sup>.  
299 It is not known if direct manipulation of these receptors in the seminal vesicles has an impact on  
300 the PERP.

301 What could be the role of copulatory PRL? PRL release may be the “side-effect” of the  
302 neuromodulatory changes that occur during sexual behavior, this is, merely the result of reduction  
303 in DA levels (DA inhibits PRL release) and/or the increase in oxytocin and serotonin (known



304 stimulating factors of PRL release) instead of having the principal role in the establishment of  
305 PERP<sup>64–66</sup>. The fact that PRL levels are already elevated during the sexual interaction in BL6 and  
306 PWK males, further suggests that PRL cannot promote by itself reduced sexual motivation, at least  
307 in male mice. Other studies point towards a role of PRL in the establishment of parental  
308 behavior<sup>67,68</sup>. New behavioral paradigms will be fundamental aid in unravelling this mystery.

309

## 310 **Methods**

311 **Animals.** BL6 (*Mus musculus domesticus*, C57BL/6J) and Wild (*Mus musculus musculus*,  
312 PWD/PhJ and PWK/PhJ) mice were ordered from The Jackson Laboratories and maintained in  
313 our animal facility. Animals were weaned at 21 days and housed in same-sex groups in stand-alone  
314 cages (1284L, Techniplast, 365 x 207 x 140 mm) with access to food and water ad libitum. Mice  
315 were maintained on a 12:12 light/dark cycle and experiments were performed during the dark  
316 phase of the cycle, under red dim light. All experiments were approved by the Animal Care and  
317 Users Committee of the Champalimaud Neuroscience Program and the Portuguese National  
318 Authority for Animal Health (Direcção Geral de Veterinária).

319 Females were kept house grouped and males were isolated before the sexual training. Both males  
320 and females were sexually experienced. Males interacted with different females in each sexual  
321 encounter. Animals were habituated to be handled and to the assay routine to reduce stress. All  
322 experiments were conducted in parallel for both BL6 and PWK. Trials were conducted in the male  
323 home cage (1145T, Techniplast, 369 x 156 x 132 mm) striped from nesting, food and water;  
324 covered with a transparent acrylic lid. The trial started with the entry of the female in the setup  
325 (t=0min).

326

327 **Ovariectomy and hormonal priming.** All females underwent bilateral ovariectomy under  
328 isoflurane anesthesia (1-2% at 1L/min). After exposing the muscle with one small dorsal incision  
329 (1 cm) a small incision was made in the muscle wall, at the ovary level, on each side. The ovarian  
330 arteries were cauterized and both ovaries were removed. The skin was sutured, and the suture  
331 topped with iodine and wound powder. The animals received an ip injection of carprofen before  
332 being housed individually with food supplemented with analgesic (MediGel, 1mg carprofen /2 oz  
333 cup) for 2 days recovery and then re-grouped in their home cages.

334 Female mice were primed subcutaneously 48 hours before the assay with 0,1ml estrogen (1mg/ml,  
335 Sigma E815 in sesame oil) and 4 hours before the assay with 0,1ml progesterone (5mg/ml, Sigma  
336 088K0671 in sesame oil).

337

338 **Blood collection.** Tail-tip whole blood sampling was done as previously described<sup>45</sup>. Briefly,  
339 blood was collected from the male tail, immediately diluted in PBS-T (PBS, 0.05% Tween20) and  
340 frozen at -20°C straightaway, where it was stored until use.

341 To profile [PRL]<sub>blood</sub> during sexual behavior (Fig. 1a), baseline blood was collected 30 minutes  
342 before (t=-30min) the female entry (t=0min). From this point on, blood collection was locked to  
343 the onset of specific behaviors: once the male did the first mount attempt (MA), after executing of

344 a fixed number of mounts (Mx) and after ejaculation. We choose Mx=5 for BL6 and Mx=3 for  
345 PWK to ensure that the males would have significant sexual interaction without reaching  
346 ejaculation. Contrarily to PWK males that, in the presence of a receptive female, the majority  
347 engages in sexual behavior, BL6 do not. Thus, after 30 minutes interacting with the female without  
348 displaying sexual interest, we collected a blood sample and terminated the trial (Fig. 1b, social).  
349 Because blood collection is an invasive procedure and PRL is also released under stress we  
350 evaluated if the manipulation itself could induce PRL release. For that we collected blood every  
351 20 minutes for 1 hour from males resting in their home cage (Fig. 1c).

352 Domperidone is a d2 antagonist that was previously used to study the inhibitory tone of dopamine  
353 on PRL release from the pituitary, inducing a PRL peak 15 minutes after ip injection<sup>45</sup>. To test  
354 the magnitude of the PRL release of the two mouse strains under domperidone (Fig 2a), we  
355 conducted a pilot study where we collected a blood sample before (baseline) and 15 minutes after  
356 domp injection (20mg/kg, abcam Biochemicals). We opted to manipulate [PRL]<sub>blood</sub> trough  
357 domperidone instead of injecting PRL directly to induce a PRL release similarly to a natural  
358 occurring instead of adding a recombinant form.

359 Bromocriptine is a D2 dopamine receptor agonist known to inhibit endogenous prolactin release  
360<sup>31</sup>. To test its efficacy on blocking PRL release during sexual behavior (Fig. 3a) we conducted a  
361 second pilot study where the males were injected (100 µg bromo or vehicle) 2 hours before the  
362 trial started. Blood samples were collected just before injection, 1 hour after injection and after  
363 ejaculation.

364  
365 **Prolactin quantification.** [PRL]<sub>blood</sub> quantification was done as previously described<sup>45</sup>. Briefly, a  
366 96-well plate (Sigma-Aldrich cls 9018–100EA) was coated with 50 µl capture antibody antirat  
367 PRL (anti-rPRL-IC) (National Institute of Diabetes and Digestive and Kidney Diseases (NIDDK),  
368 AFP65191 (Guinea Pig), NIDDK-National Hormone and Pituitary Program (NHPP,  
369 TORRANCE, CA) at a final dilution of 1:1000 in PBS of the antibody stock solution, reconstituted  
370 in PBS as described in the datasheet (Na<sub>2</sub>HPO<sub>4</sub> 7.6 mM; NaH<sub>2</sub>PO<sub>4</sub> 2.7 mM and NaCl 0.15M; pH  
371 7.4). The plate was protected with Parafilm® and incubated at 4°C overnight in a humidified  
372 chamber. The coating antibody was decanted and 200 µl of blocking buffer (5% skimmed milk  
373 powder in PBS-T) was added to each well to block nonspecific binding. The plate was left for 2  
374 hours at room temperature on a microplate shaker. In parallel, a standard curve was prepared using  
375 a 2-fold serial dilution of Recombinant mouse Prolactin (mPRL; AFP-405C, NIDDK-NHPP) in  
376 PBS-T with BSA 0.2 mg/mL (bovine serum albumin; Millipore 82–045–1). After the blocking  
377 step, the plate was washed (3 times for 3 minutes at room temperature with PBS-T), 50µl of quality  
378 control (QC), standards or samples were loaded in duplicate into the wells and incubated for 2  
379 hours at room temperature on the microplate shaker. The plate was washed, and the complex was  
380 incubated for another 90 minutes with 50 µl detection antibody (rabbit alpha mouse PRL; a gift  
381 from Patrice Mollard Lab) at a final dilution of 1:50 000 in blocking buffer solution. Following a  
382 final wash, this complex was incubated for 90 minutes with 50 µl horseradish peroxidase-  
383 conjugated antibody (anti rabbit, IgG, Fisher Scientific; NA934) diluted in 50% PBS, 50%

384 blocking buffer. One tablet of O-phenylenediamine (Life technologies SAS 00–2003) was diluted  
385 into 12 ml Citrate-phosphate buffer pH 5, containing 0.03% hydrogen peroxide. 100  $\mu$ l of this  
386 substrate solution was added to each well (protected from light), and the reaction was stopped after  
387 30 minutes with 50  $\mu$ l of 3M HCl. The optical density from each well was determined at 490nm  
388 using a microplate reader (SPECTROstar<sup>Nano</sup>, BMG LABTECH). An absorbance at 650nm was  
389 used for background correction.

390 A linear regression was used to fit the optical densities of the standard curve vs their concentration  
391 using samples ranging from 0.1172ng/ml to 1.875ng/ml. Appropriate sample dilutions were  
392 carried out in order to maintain detection in the linear part of the standard curve. PRL  
393 concentrations were extrapolated from the OD of each sample. To control for reproducibility of  
394 the assay, trunk blood of males injected with domperidone was immediately diluted in PBS-T and  
395 pulled to be used as quality control (QC). Loading of the wells was done vertically left to right and  
396 QC was always loaded on the top row. The formula  $OD(Co,t) = OD(Ob) + \alpha(QC).t$  was used to  
397 correct the ODs for loading dwell time (OD: optical density, Co: corrected, t: well number, Ob:  
398 observed,  $\alpha$ : QC linear regression'  $\alpha$ ). Coefficient of variability was kept to a maximum of 10%.

399  
400 **Behavioral assays.** Each male underwent two trials: one with vehicle and one with drug  
401 (domperidone or bromocriptine). Administrations were counter balanced between animals and  
402 spaced seven days. In the first assay, for pharmacological induction of acute PRL release (Fig. 2b),  
403 the male was injected ip with domperidone or vehicle 15 minutes before the trial started ( $t=-$   
404 15min). Animals were allowed to interact until the male reached ejaculation or 1 hour in the case  
405 the male did not display sexual behavior. Conversely, for pharmacological blockage of PRL  
406 release (Fig. 3b), a second group of males were pre-treated with bromocriptine or vehicle with a  
407 subcutaneous injection 2 hours before the beginning of the trial ( $t=-120$ min). Animals were  
408 allowed to interact until a maximum of 2 hours after the male reached ejaculation or 1h in the case  
409 the male did not display sexual behavior.

410  
411 **Behavior analysis.** The behavior was recorded from the top and side with pointgrey cameras (FL3-  
412 U3-13S2C-CS) connected to a computer running a custom Bonsai software<sup>69</sup>. Behavior was  
413 manually annotated using the open source program Python Video Annotator  
414 (<https://pythonvideoannotator.readthedocs.io>) and analyzed using Matlab. The number of mount  
415 attempts (MA, mount without intromission), mounts (mounts with intromission), latency to mount  
416 (first MA or mount), latency to ejaculation and PERP (latency between ejaculation and the next  
417 mount) was calculated. Total number of mounts (TM) was calculated as the sum of MA and  
418 mounts and TM rate was calculated as  $(TM)/(latency\ to\ ejaculate)$ . The percentage of animals that  
419 reached ejaculation and regain sexual interest under 2 hours (Refractory period) were also  
420 calculated. The modulation index (MI) was calculated as  $(X_{drug}-X_{vehicle})/(X_{drug}+X_{vehicle})$ . The  
421 centroid position and individual identity of each pair was followed off-line using the open source  
422 program idtracker.ai<sup>70</sup> and used to calculate male velocity and inter individual distance with  
423 Matlab (Supplementary Fig. 3)

424

425 **Statistical analysis.** The statistical details of each experiment, including the statistical tests used  
426 and exact value of n are detailed in each figure legend. Data related to prolactin quantification was  
427 analyzed using GraphPad Prism 7 software and presented as mean  $\pm$  S.D. For comparison within  
428 strain (Fig. 1a and c) an RM One-way Anova followed by a Tukey's multiple comparison test was  
429 used. Comparison of paired samples comparing two groups, statistical analysis was performed by  
430 using a paired-sample two-tailed *t* test (Fig. 1b, 2a baseline-Domp and 3a). Analysis between  
431 unpaired samples comparing two groups was performed using an unpaired-sample two-tailed *t* test  
432 (Fig. 2a Domp-Ejaculation). Data related to animal behavior was analyzed with MATLAB R2019b  
433 and presented as median  $\pm$  M.A.D. (median absolute deviation with standard scale factor). Animals  
434 were randomized between treatments and comparison between the two conditions were done with  
435 Wilcoxon rank sum test (Fig. 2d-f, 3e-h and supplementary Fig. 4 to 6). Only animals that  
436 ejaculates in both session were included in the statistical comparisons (Domperidone:  $n_{BL6} = 7$ ,  
437  $n_{PWK} = 13$ ; Bromocriptine:  $n_{BL6} = 10$ ,  $n_{PWK} = 13$ ). Significance was accepted at  $P < 0.05$  for all  
438 tests.

439

## 440 **References**

- 441 1. Masters, W. H. & Johnson, V. E. *Human sexual response*. (Little Brown, Boston, 1966).
- 442 2. Seizert, C. A. The Neurobiology of the Male Sexual Refractory Period. *Neurosci Biobehav*  
443 *Rev* **92**, 350---377 (2018).
- 444 3. Levin, R. J. Revisiting Post-Ejaculation Refractory Time—What We Know and What We Do  
445 Not Know in Males and in Females. *J Sex Medicine* **6**, 2376--2389 (2009).
- 446 4. McGill, T. E. Sexual Behavior of the Mouse after Long-Term and Short-Term Postejaculatory  
447 Recovery Periods. *J Genetic Psychology* **103**, 53--57 (1963).
- 448 5. Rodriguez-Manzo, G. Blockade of the establishment of the sexual inhibition resulting from  
449 sexual exhaustion by the Coolidge effect. *Behav Brain Res* **100**, 245--254 (1999).
- 450 6. Wilson, J. R., Kuehn, R. E. & Beach, F. A. Modification in the sexual behavior of male rats  
451 produced by changing the stimulus female. *J Comp Physiol Psych* **56**, 636 (1963).
- 452 7. Rojas-Durán, F. *et al.* Correlation of prolactin levels and PRL-receptor expression with Stat  
453 and Mapk cell signaling in the prostate of long-term sexually active rats. *Physiol Behav* **138**,  
454 188---192 (2015).
- 455 8. Hernandez, M. E. *et al.* Prostate response to prolactin in sexually active male rats. *Reprod Biol*  
456 *Endocrin* **4**, 28 (2006).
- 457 9. Kruger, T. H. C., Haake, P., Hartmann, U., Schedlowski, M. & Exton, M. S. Orgasm-induced  
458 prolactin secretion: feedback control of sexual drive? *Neurosci Biobehav Rev* **26**, 31---44 (2002).

- 459 10. Drago, F. Prolactin and sexual behavior: A review. *Neurosci Biobehav Rev* **8**, 433--439  
460 (1984).
- 461 11. Freeman, M. E., Kanyicska, B., Lerant, A. & Nagy, G. Prolactin: Structure, Function, and  
462 Regulation of Secretion. *Physiol Rev* **80**, 1523---1631 (2000).
- 463 12. Grattan, D. R. & Kokay, I. C. Prolactin: A Pleiotropic Neuroendocrine Hormone. *J*  
464 *Neuroendocrinol* **20**, 752--763 (2008).
- 465 13. Brody, S. & Krüger, T. H. C. The post-orgasmic prolactin increase following intercourse is  
466 greater than following masturbation and suggests greater satiety. *Biol Psychol* **71**, 312---315  
467 (2006).
- 468 14. Egli, M., Leeners, B. & Kruger, T. H. C. Prolactin secretion patterns: basic mechanisms and  
469 clinical implications for reproduction. *Reproduction Camb Engl* **140**, 643--654 (2010).
- 470 15. Exton, M. S. *et al.* Coitus-induced orgasm stimulates prolactin secretion in healthy subjects.  
471 *Psychoneuroendocrino* **26**, 287---294 (2001).
- 472 16. Exton, N. G. *et al.* Neuroendocrine response to film-induced sexual arousal in men and  
473 women. *Psychoneuroendocrino* **25**, 187---199 (2000).
- 474 17. Krüger, T. *et al.* NEUROENDOCRINE AND CARDIOVASCULAR RESPONSE TO  
475 SEXUAL AROUSAL AND ORGASM IN MEN. *Psychoneuroendocrino* **23**, 401--411 (1998).
- 476 18. Krüger, T. H. C. *et al.* Serial neurochemical measurement of cerebrospinal fluid during the  
477 human sexual response cycle. *Eur J Neurosci* **24**, 3445--3452 (2006).
- 478 19. Exton, M. S. *et al.* Cardiovascular and Endocrine Alterations After Masturbation-Induced  
479 Orgasm in Women. *Psychosom Med* **61**, 280--289 (1999).
- 480 20. Kruger, T. *et al.* Specificity of the neuroendocrine response to orgasm during sexual arousal  
481 in men. *J Endocrinol* **177**, 57---64 (2003).
- 482 21. Oaknin, S., Castillo, A. R. D., Guerra, M., Battaner, E. & Mas, M. Changes in forebrain  
483 Na,K-ATPase activity and serum hormone levels during sexual behavior in male rats. *Physiol*  
484 *Behav* **45**, 407--410 (1989).
- 485 22. Haake, P. *et al.* Absence of orgasm-induced prolactin secretion in a healthy multi-orgasmic  
486 male subject. *Int J Impot Res* **14**, 3900823 (2002).
- 487 23. Svare, B. *et al.* Hyperprolactinemia Suppresses Copulatory Behavior in Male Rats and Mice.  
488 *Biol Reprod* **21**, 529---535 (1979).
- 489 24. Buvat, J. Hyperprolactinemia and sexual function in men: a short review. *Int J Impot Res* **15**,  
490 3901043 (2003).

- 491 25. Sato, F. *et al.* Suppressive Effects of Chronic Hyperprolactinemia on Penile Erection and  
492 Yawning Following Administration of Apomorphine to Pituitary-Transplanted Rats. *J Androl* **18**,  
493 21--25 (1997).
- 494 26. Melmed, S. *et al.* Diagnosis and Treatment of Hyperprolactinemia: An Endocrine Society  
495 Clinical Practice Guideline. *J Clin Endocrinol Metabolism* **96**, 273--288 (2011).
- 496 27. Grattan, D. R. & Bridges, R. S. Hormones, Brain and Behavior (Second Edition). *Endocr*  
497 *Syst Interact Brain Behav* 2471--2504 (2009) doi:10.1016/b978-008088783-8.00079-6.
- 498 28. Riddle, O., Bates, R. W. & Dykshorn, S. W. THE PREPARATION, IDENTIFICATION  
499 AND ASSAY OF PROLACTIN—A HORMONE OF THE ANTERIOR PITUITARY. *Am J*  
500 *Physiology-legacy Content* **105**, 191--216 (1933).
- 501 29. Ganong, W. F. Circumventricular Organs: Definition And Role In The Regulation Of  
502 Endocrine And Autonomic Function. *Clin Exp Pharmacol P* **27**, 422--427 (2000).
- 503 30. Grattan, D. R. *et al.* Feedback Regulation of PRL Secretion Is Mediated by the Transcription  
504 Factor, Signal Transducer, and Activator of Transcription 5b. *Endocrinology* **142**, 3935--3940  
505 (2001).
- 506 31. Brown, R. S. E., Kokay, I. C., Herbison, A. E. & Grattan, D. R. Distribution of prolactin-  
507 responsive neurons in the mouse forebrain. *J Comp Neurology* **518**, 92--102 (2010).
- 508 32. Salais-López, H., Agustín-Pavón, C., Lanuza, E. & Martínez-García, F. The maternal  
509 hormone in the male brain: Sexually dimorphic distribution of prolactin signaling in the mouse  
510 brain. *Plos One* **13**, e0208960 (2018).
- 511 33. Esteves, F. F., Matias, D., Mendes, A. R., Lacoste, B. & Lima, S. Q. Sexually dimorphic  
512 neuronal inputs to the neuroendocrine dopaminergic system governing prolactin release. *J*  
513 *Neuroendocrinol* **31**, (2019).
- 514 34. Kirk, S. E., Grattan, D. R. & Bunn, S. J. The median eminence detects and responds to  
515 circulating prolactin in the male mouse. *J Neuroendocrinol* **31**, e12733 (2019).
- 516 35. Georgescu, T., Ladyman, S. R., Brown, R. S. E. & Grattan, D. R. Acute effects of prolactin  
517 on hypothalamic prolactin receptor expressing neurones in the mouse. *Biorxiv*  
518 2020.05.10.087650 (2020) doi:10.1101/2020.05.10.087650.
- 519 36. Bole-Feysot, C., Goffin, V., Edery, M., Binart, N. & Kelly, P. A. Prolactin (PRL) and Its  
520 Receptor: Actions, Signal Transduction Pathways and Phenotypes Observed in PRL Receptor  
521 Knockout Mice. *Endocr Rev* **19**, 225--268 (1998).
- 522 37. Corona, G., Jannini, E. A., Vignozzi, L., Rastrelli, G. & Maggi, M. The hormonal control of  
523 ejaculation. *Nat Rev Urology* **9**, 508 (2012).

- 524 38. Levin, R. Is prolactin the biological “off switch” for human sexual arousal? *Sex Relatsh Ther*  
525 **18**, 237--243 (2003).
- 526 39. Turley, K. R. & Rowland, D. L. Evolving ideas about the male refractory period. *Bju Int* **112**,  
527 442--452 (2013).
- 528 40. Kamel, F., Right, W. W., Mock, E. J. & Frankel, A. I. The Influence of Mating and Related  
529 Stimuli on Plasma Levels of Luteinizing Hormone, Follicle Stimulating Hormone, Prolactin, and  
530 Testosterone in the Male Rat 1. *Endocrinology* **101**, 421--429 (1977).
- 531 41. Kamel, F. & Frankel, A. J. Hormone Release during Mating in the Male Rat: Time Course,  
532 Relation to Sexual Behavior, and Interaction with Handling Procedures\*. *Endocrinology* **103**,  
533 2172--2179 (1978).
- 534 42. Kruger, T. *et al.* Effects of acute prolactin manipulation on sexual drive and function in  
535 males. *J Endocrinol* **179**, 357--365 (2003).
- 536 43. Lenschow, C. & Lima, S. Q. In the mood for sex: neural circuits for reproduction. *Curr Opin*  
537 *Neurobiol* **60**, 155--168 (2020).
- 538 44. Gregorová, S. & Forejt, J. PWD/Ph and PWK/Ph inbred mouse strains of *Mus m. musculus*  
539 subspecies--a valuable resource of phenotypic variations and genomic polymorphisms. *Folia*  
540 *Biol-prague* **46**, 31---41 (2000).
- 541 45. Guillou, A. *et al.* Assessment of Lactotroph Axis Functionality in Mice: Longitudinal  
542 Monitoring of PRL Secretion by Ultrasensitive-ELISA. *Endocrinology* **156**, 1924---1930 (2015).
- 543 46. Gala, R. R. The physiology and mechanisms of the stress-induced changes in prolactin  
544 secretion in the rat. *Life Sci* **46**, 1407--1420 (1990).
- 545 47. Lyons, D. J. & Broberger, C. TIDAL WAVES: Network mechanisms in the neuroendocrine  
546 control of prolactin release. *Front Neuroendocrin* **35**, 420--438 (2014).
- 547 48. Grattan, D. R. 60 YEARS OF NEUROENDOCRINOLOGY: The hypothalamo-prolactin  
548 axis. *J Endocrinol* **226**, T101--T122 (2015).
- 549 49. Cocchi, D. *et al.* Prolactin-Releasing Effect of a Novel Anti-Dopaminergic Drug,  
550 Domperidone, in the Rat. *Neuroendocrinology* **30**, 65--69 (1980).
- 551 50. Costall, B., Fortune, D. H. & Naylor, R. J. Neuropharmacological studies on the neuroleptic  
552 potential of domperidone (R33812). *J Pharm Pharmacol* **31**, 344--347 (1979).
- 553 51. Molik, E. & Błasiak, M. The Role of Melatonin and Bromocriptine in the Regulation of  
554 Prolactin Secretion in Animals – A Review. *Ann Anim Sci* **15**, 849--860 (2015).

- 555 52. puglisi-Allegra, S. & Cabib, S. PSYCHOPHARMACOLOGY OF DOPAMINE: THE  
556 CONTRIBUTION OF COMPARATIVE STUDIES IN INBRED STRAINS OF MICE. *Prog*  
557 *Neurobiol* **51**, 637---661 (1997).
- 558 53. Cabib, S., Puglisi-Allegra, S. & Ventura, R. The contribution of comparative studies in  
559 inbred strains of mice to the understanding of the hyperactive phenotype. *Behav Brain Res* **130**,  
560 103---109 (2002).
- 561 54. Welker, E. & Loos, H. V. der. Quantitative correlation between barrel-field size and the  
562 sensory innervation of the whiskerpad: a comparative study in six strains of mice bred for  
563 different patterns of mystacial vibrissae. *J Neurosci* **6**, 3355---3373 (1986).
- 564 55. Fernandes, C. *et al.* Behavioral Characterization of Wild Derived Male Mice (*Mus musculus*  
565 *musculus*) of the PWD/Ph Inbred Strain: High Exploration Compared to C57BL/6J. *Behav Genet*  
566 **34**, 621---630 (2004).
- 567 56. Onos, K. D. *et al.* Enhancing face validity of mouse models of Alzheimer's disease with  
568 natural genetic variation. *Plos Genet* **15**, e1008155 (2019).
- 569 57. Deschepper, C. F., Olson, J. L., Otis, M. & Gallo-Payet, N. Characterization of blood  
570 pressure and morphological traits in cardiovascular-related organs in 13 different inbred mouse  
571 strains. *J Appl Physiol* **97**, 369---376 (2004).
- 572 58. Krüger, T. H. C., Hartmann, U. & Schedlowski, M. Prolactinergic and dopaminergic  
573 mechanisms underlying sexual arousal and orgasm in humans. *World J Urol* **23**, 130---138  
574 (2005).
- 575 59. Bronson, F. H. & Desjardins, C. Endocrine Responses to Sexual Arousal in Male Mice\*.  
576 *Endocrinology* **111**, 1286--1291 (1982).
- 577 60. Pfaus, J. G. Pathways of Sexual Desire. *J Sex Medicine* **6**, 1506--1533 (2009).
- 578 61. Pfaus, J. G. & Phillips, A. G. Role of Dopamine in Anticipatory and Consummatory Aspects  
579 of Sexual Behavior in the Male Rat. *Behav Neurosci* **105**, 727--743 (1991).
- 580 62. Hull, E. M., Muschamp, J. W. & Sato, S. Dopamine and serotonin: influences on male sexual  
581 behavior. *Physiol Behav* **83**, 291--307 (2004).
- 582 63. Hyun, J.-S. *et al.* Localization of Peripheral Dopamine D1 and D2 Receptors in Rat and  
583 Human Seminal Vesicles. *J Androl* **23**, 114--120 (2002).
- 584 64. McIntosh, T. K. & Barfield, R. J. Brain monoaminergic control of male reproductive  
585 behavior. I. Serotonin and the post-ejaculatory refractory period. *Behav Brain Res* **12**, 255--265  
586 (1984).



- 587 65. McIntosh, T. K. & Barfield, R. J. Brain monoaminergic control of male reproductive  
588 behavior. II. Dopamine and the post-ejaculatory refractory period. *Behav Brain Res* **12**, 267--273  
589 (1984).
- 590 66. Carmichael, M. S. *et al.* Plasma Oxytocin Increases in the Human Sexual Response\*. *J Clin*  
591 *Endocrinol Metabolism* **64**, 27--31 (1987).
- 592 67. Brown, R. E. Hormones and Paternal Behavior in Vertebrates. *Am Zool* **25**, 895--910 (1985).
- 593 68. Schradin, C. & Anzenberger, G. Prolactin, the Hormone of Paternity. *Physiology* **14**, 223--  
594 231 (1999).
- 595 69. Lopes, G. *et al.* Bonsai: an event-based framework for processing and controlling data  
596 streams. *Front Neuroinform* **9**, 7 (2015).
- 597 70. Romero-Ferrero, F., Bergomi, M. G., Hinz, R. C., Heras, F. J. H. & Polavieja, G. G. de.  
598 idtracker.ai: tracking all individuals in small or large collectives of unmarked animals. *Nat*  
599 *Methods* **16**, 179--182 (2019).

600

601 **Data availability.** All data generated to support the findings of this study are available from the  
602 corresponding author upon reasonable request.

603

#### 604 **Acknowledgements**

605 We thank Patrice Mollard for welcoming S.V. in his laboratory to learn the uElisa technique and  
606 for provision of antibodies. We also express our gratitude to Francisco Romero for all the support  
607 with IdTracker and to Gil Costa for the figure design. This work was supported by Champalimaud  
608 Foundation, ERC consolidator Grant (772827), Fundação para a Ciência e Tecnologia SFRH / BD  
609 / 51011 / 2010 (S.V.) and PhRMA Foundation Postdoctoral Fellowship in Informatics (T.M).

610

#### 611 **Author contribution**

612 S.Q.L. and S.V. designed the study. S.V. did the experiments, annotation of the behavior and  
613 IdTracker. T.M. wrote the Matlab code. S.V. analyzed the data with input from S.Q.L. and T.G.  
614 S.Q.L. and S.V. wrote the paper with contributions from others.

615

616 **Competing interests:** The authors declare no competing interests.

617

618

619

620 **Figure 1**

621  
622

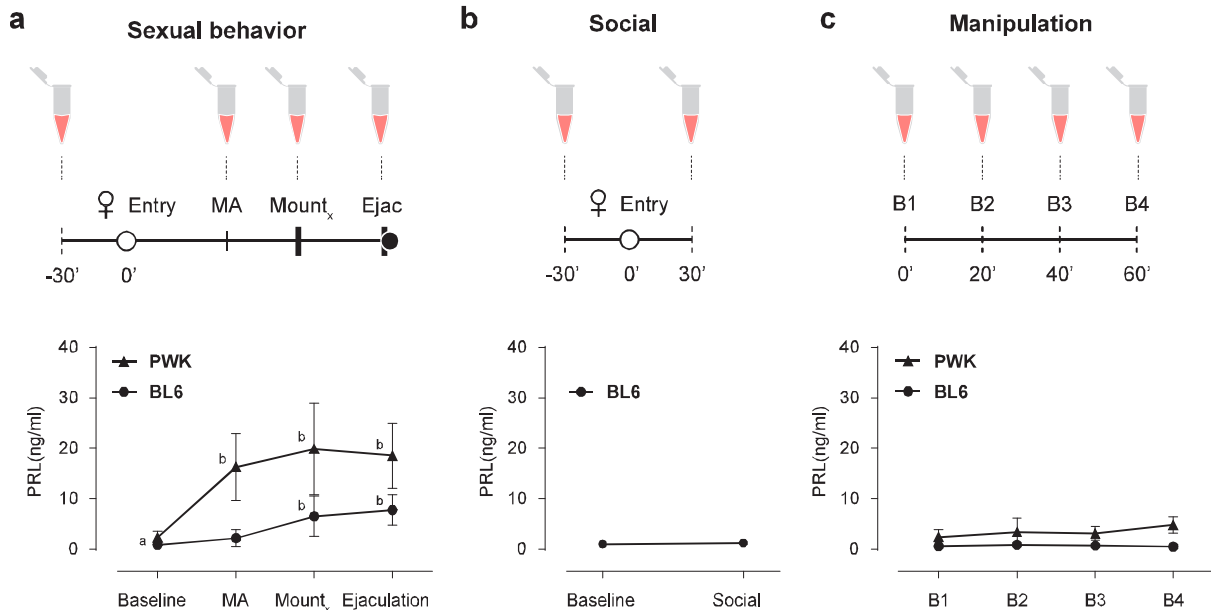

623  
624  
625

**Fig.1** Prolactin is released during sexual behavior in male mice.

627 **a** Timeline for blood collection and [PRL]<sub>blood</sub> during sexual behavior (MA- mount attempt;  
628 BL6<sub>Xmounts</sub> = 5; PWK<sub>Xmounts</sub> = 3). RM One-way Anova for BL6 (n = 8)  $F_{3,7}=21.26$ ,  $P < 0.0001$  and  
629 PWK (n = 9)  $F_{3,8}=17.18$ ,  $P < 0.0001$ , followed by Tukey's multiple comparison test  $ab P \leq$   
630 0,01. **b** Timeline for blood collection and [PRL]<sub>blood</sub> during social behavior in BL6 males (n =  
631 15)  $P = 0.282$ , two-tailed Paired  $t$  test. **c** Timeline for blood collection and [PRL]<sub>blood</sub> during  
632 repeated sampling in resting condition. RM One-way Anova for BL6 (n = 8)  $F_{3,7} = 2.08$ ;  $P =$   
633 0.18 and PWK (n = 8) PWK  $F_{3,7} = 2.94$ ;  $P = 0.11$ . Data represented as mean  $\pm$  SD.

634  
635  
636  
637  
638  
639  
640  
641  
642  
643  
644

645 **Figure 2**

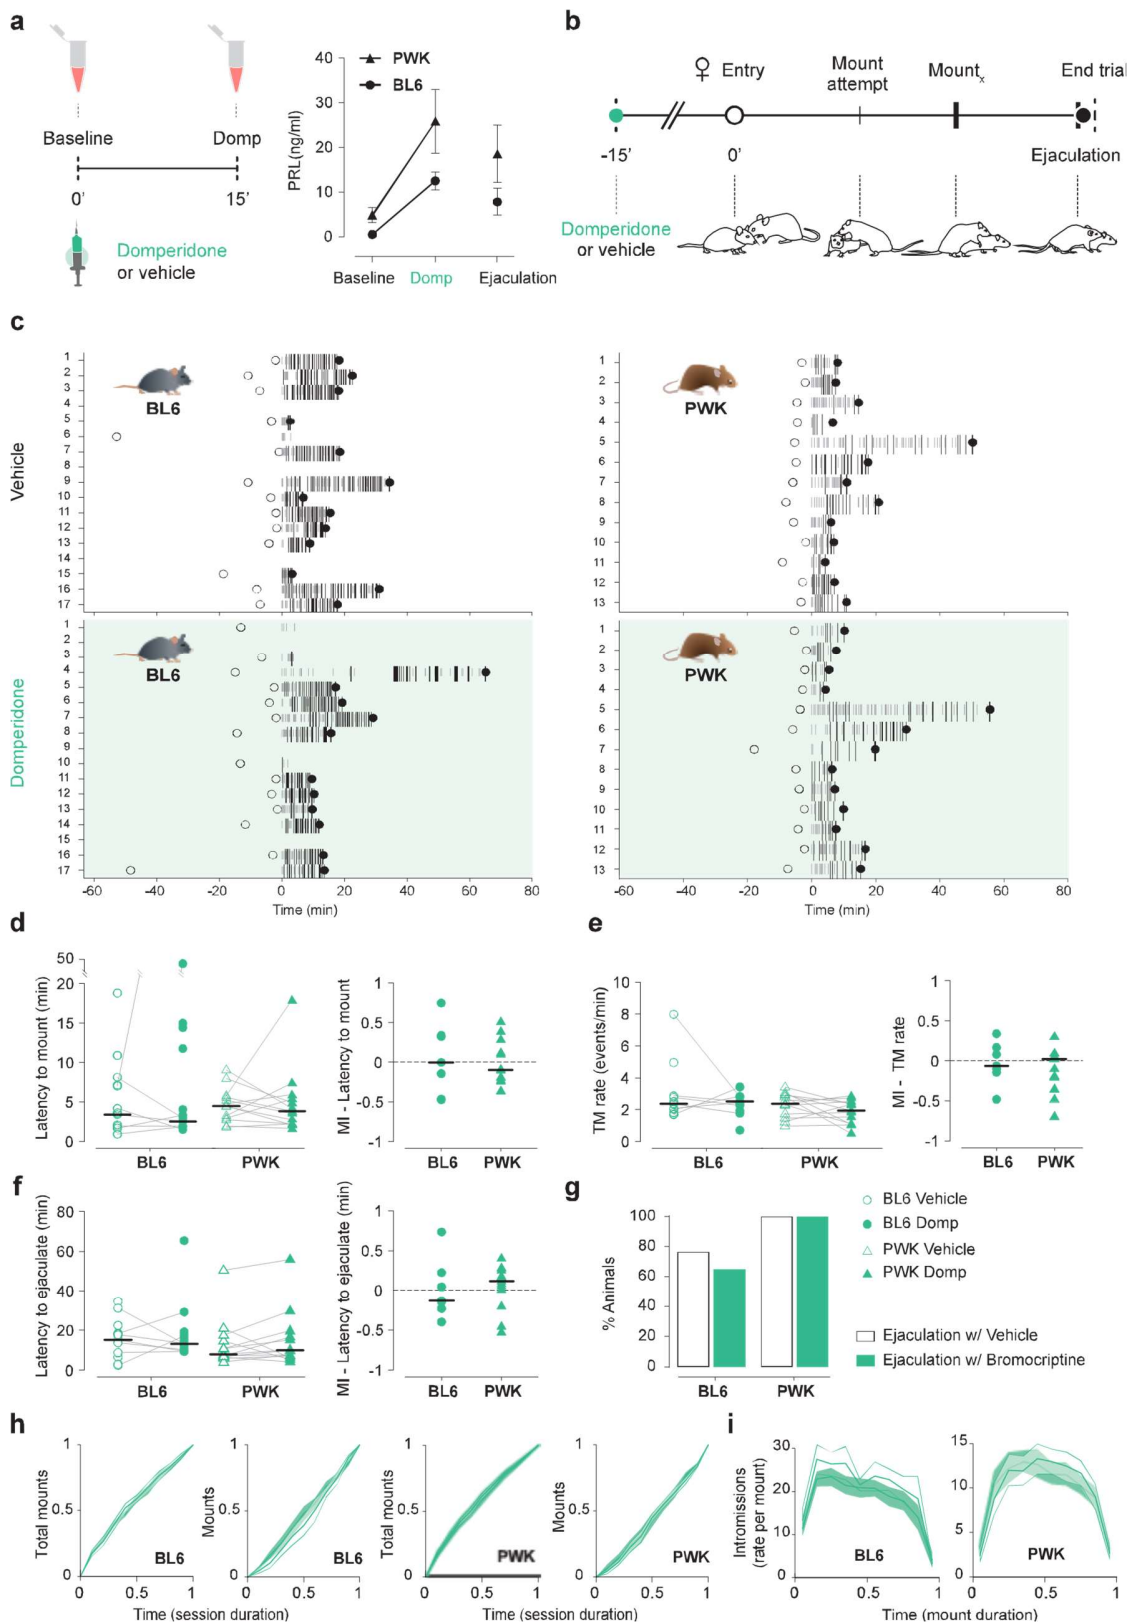

646 **Fig. 2** Acute prolactin release does not induce a refractory period-like state.  
647 **a** Timeline for blood collection and [PRL]<sub>blood</sub> after Vehicle (black) or Domperidone (Domp,  
648 green) administration. Domp-induced [PRL]<sub>blood</sub> has a similar magnitude to what is observed  
649 during copulation (from Fig.1 a), two-tailed Unpaired *t* test for BL6 (n = 8) *P* = 0.0024 and PWK  
650 (n = 9) *P* = 0.037. **b** Timeline for sexual behavior assay using sexually trained BL6 and PWK  
651 males pre-treated with vehicle or Domp (t= -15min). Each animal was tested twice, in a  
652 counterbalanced manner: one with vehicle and one with Domp. **c** Raster plot aligned to the first  
653 consummatory event (first Mount attempt or Mount), representing the sexual behavior executed by  
654 the male, with mount attempts represented in small grey bars, mounts in long black bars (width  
655 correlated with mount duration) and ejaculation with a black circle. Time of female entry in the  
656 apparatus represented with an open circle. BL6 n = 17; PWK n = 13. Quantification of **d** Latency  
657 to mount (first mount attempt or mount) (BL6 *P* = 1.0, PWK *P* = 0.6355), **e** rate of Total Mounts  
658 (TM, mount attempts + mounts) (BL6 *P* = 0.9375, PWK *P* = 0.3054) and **f** Latency to ejaculate  
659 (BL6 *P* = 0.8125, PWK *P* = 0.21631). Each line represents data of an individual. Only animals  
660 that ejaculated in both sessions were considered in the statistics (n<sub>BL6</sub> = 7, n<sub>PWK</sub> = 13). Individuals  
661 that did not ejaculate in one of the trials are represented as unconnected dots (not used in statistics).  
662 MI [modulation index (domp-veh)/(dom+veh)] between the two conditions for both strains. Data  
663 presented as median ± M.A.D. (median absolute deviation with standard scale factor) following  
664 Wilcoxon rank sum test. **g** Percentage of animals that reached ejaculation in the vehicle  
665 and Domp condition. **h** Cumulative distributions of Total mounts and Mounts along the behavioral  
666 assay. Histogram aligned to the first consummatory event with 0,1min bins. Time normalized for  
667 the duration of the session from female entry to ejaculation. **j** Rate of intromissions executed  
668 during the mount. Histogram for all mounts of each session, aligned to beginning of the mount with  
669 0,1min bins. Time normalized for the duration of the mount.  
670

671 **Figure 3**

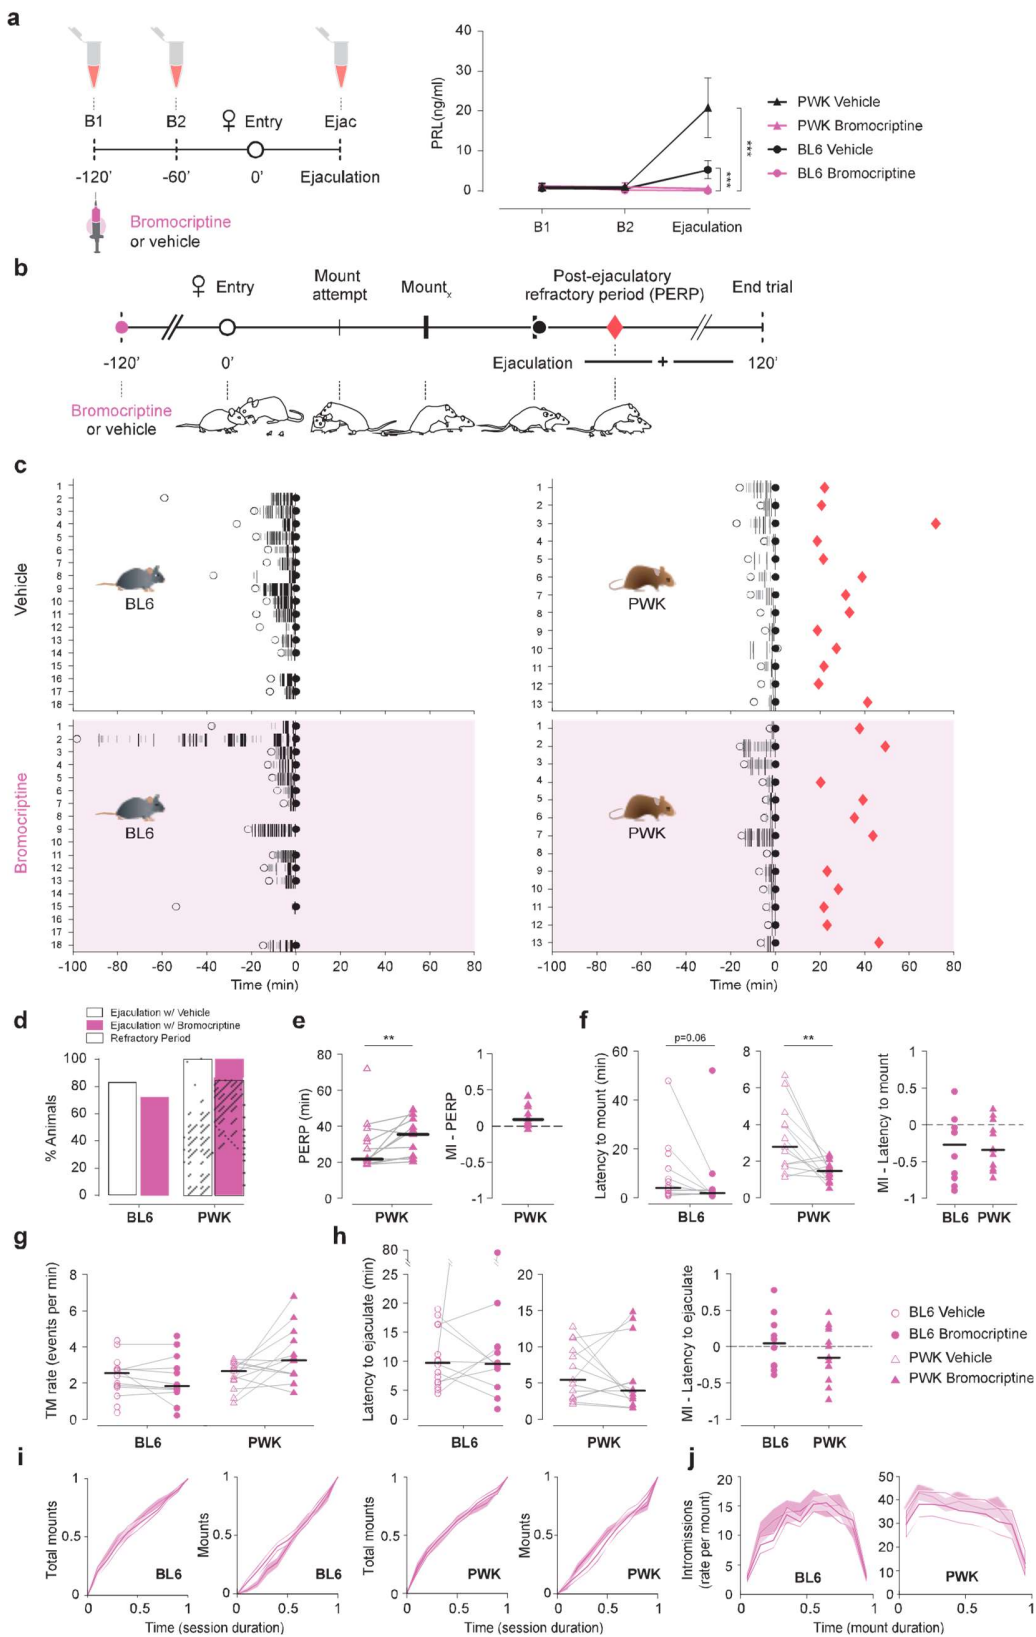

672 **Fig. 3** Blocking prolactin release during copulation does not decrease the duration of the refractory  
673 period.

674 **a** Timeline for blood collection and [PRL]<sub>blood</sub> after Vehicle (black) or Bromocriptine (pink)  
675 administration. RM two-way Anova with treatment (veh or bromo) as between subject's factor and  
676 time (B1, B2 and Ejac) as the within subject's factor, followed by Tukey's multiple comparison  
677 test: BL6 (n = 5 each) Treatment  $F_{1,8}=21.08, P = 0.0018$  Ejac<sub>veh</sub> vs. Ejac<sub>bromo</sub>  $P < 0.0001$ ;  
678 Time  $F_{2,16}=18.41, P < 0.0001$ , B1<sub>bromo</sub> vs. Ejac<sub>bromo</sub>  $P = 0.3$ ; and PWK ( $n_{veh} = 6, n_{bromo} = 4$ )  
679 Treatment  $F_{1,8}=28.43, P = 0.0007$  Ejac<sub>veh</sub> vs. Ejac<sub>bromo</sub>  $P < 0.0001$ ; Time  $F_{2,16}=23.97, P < 0.0001$ ,  
680 B1<sub>bromo</sub> vs. Ejac<sub>bromo</sub>  $P = 0.97$ . **b** Timeline for sexual behavior assay using sexually trained BL6  
681 and PWK males pre-treated with vehicle or Bromocriptine (t=-120 min). Each animal was tested  
682 twice in a counterbalanced manner. **c** Raster plot aligned to ejaculation, representing the sexual  
683 behavior performed by the male, with mount attempts represented in small grey bars, mounts in  
684 long black bars (width correlated with mount duration), ejaculation with a black circle and PERP  
685 (latency to the first consummatory event (mount attempt or mount) after ejaculation represented  
686 with a red diamond. Time of female entry in the apparatus represented with an open circle. BL6 n  
687 = 18; PWK, n = 13. **d** Percentage of animals that reached ejaculation (solid color) and re-initiated  
688 the consummatory behavior after ejaculating (PERP, dashed color) in vehicle (white) and Bromo  
689 (pink) conditions. Quantification of **e** PERP duration, **f** latency to mount (first MA or  
690 Mount) (BL6  $P = 0.0644$ , PWK  $P = 0.0132$ ), **g** rate of Total Mounts (TM, MA+mounts) (BL6  $P =$   
691  $0.32$ , PWK  $P = 0.0681$ ) and **h** latency to ejaculate (BL6  $P = 0.92$ , PWK  $P = 0.68$ ). Each line  
692 represents data of an individual; Only animals that ejaculated in both sessions were considered in  
693 the statistics ( $n_{BL6} = 10, n_{PWK} = 13$ ). Individuals that did not ejaculate in one of the trials are  
694 represented as unconnected dots (not used in statistics).

695 Data presented as median  $\pm$  M.A.D. (median absolute deviation with standard scale factor)  
696 following Wilcoxon rank sum test. MI [modulation index (bromo-veh)/(bromo+veh)] between the  
697 two conditions for both strains. \*\*\* $P < 0.0001$ . **i** Cumulative distributions of Total mounts and  
698 Mounts along the behavioral assay. Histogram aligned to the first consummatory event with  
699 0,1min bins. Time normalized for the duration of the session from female entry to  
700 ejaculation. **J**: Rate of intromissions executed during the mount. Histogram for all mounts of each  
701 session, aligned to beginning of the mount with 0,1min bins. Time normalized for the duration of  
702 the mount.

703
